# Supplementary material for: Sex differences in hepatocellular carcinoma indicated BEX4 as a potential target to improve efficacy of lenvatinib plus immune checkpoint inhibitors
Source: PubMed Central journal article supplement (PMC9475366; doi:10.7150/jca.73051), 2022-09-06
Supplement: jcav13p3221s1.pdf [file jcav13p3221s1.pdf]

Figure S1. Immune cell infiltration analysis. Overview of levels of the 22 tumor-infiltrating immune cells in male and female patients.

Figure S2. Sex-based gene differential expression analysis. Scatter plot shows distribution of DEGs in female and male patients.

Figure S3. Sex-based functional enrichment analysis

- (A) Enriched pathways of genes exclusively downregulated in female patients.
- (B) Enriched pathways of genes exclusively upregulated in female patients.
- (C) Enriched pathways of genes exclusively downregulated in male patients.
- (D) Enriched pathways of genes exclusively upregulated in male patients.

Figure S4. Analysis of BEX4 in HCC.

- (A) Correlation between BEX4 expression and tumor grade in HCC patients.
- (B) Correlation between BEX4 expression and disease stage in HCC patients.
- (C) Correlation between immune checkpoint molecules and BEX4 expression in HCC patients.
- (D) Correlation between BEX4 expression and small molecule drug sensitivity.

Figure S5. Validation of BEX4 in GSE64041 dataset.

- (A) Comparison of BEX4 expression between paired normal and tumor samples in GSE64041.
- (B) Expression correlation between BEX4 and CD20 (B cell marker).
- (C) Expression correlation between BEX4 and CD4 (CD4 T cell marker).
- (D) Expression correlation between BEX4 and CD8A (CD8 T cell marker).
- (E) Expression correlation between BEX4 and CD68 (Macrophage marker).
- (F) Expression correlation between BEX4 and CD1C (Dendritic cell marker).
- (G) Expression correlation between BEX4 and CD16 (Neutrophil marker).
- (H) Expression correlation between BEX4 and TIM3.
- (I) Expression correlation between BEX4 and LGALS9.
- (J) Expression correlation between BEX4 and PD-L1.

Figure S1

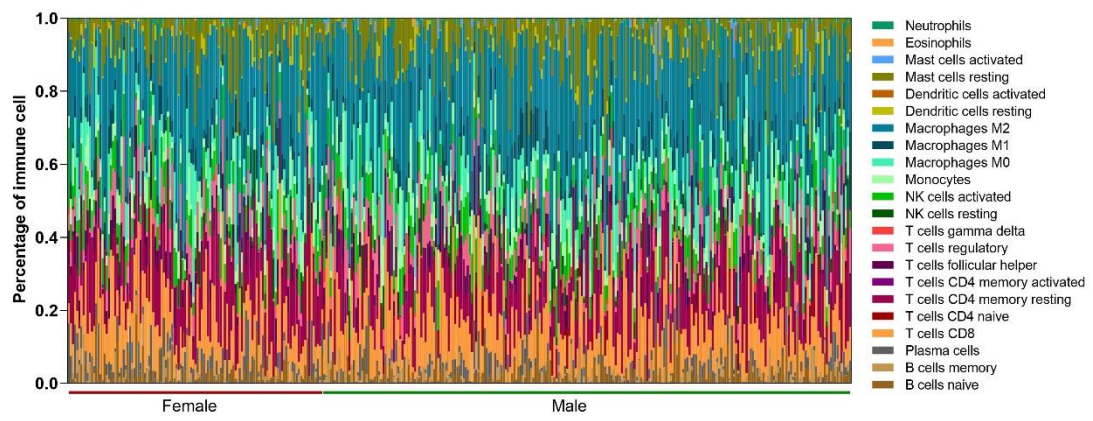

Figure S2

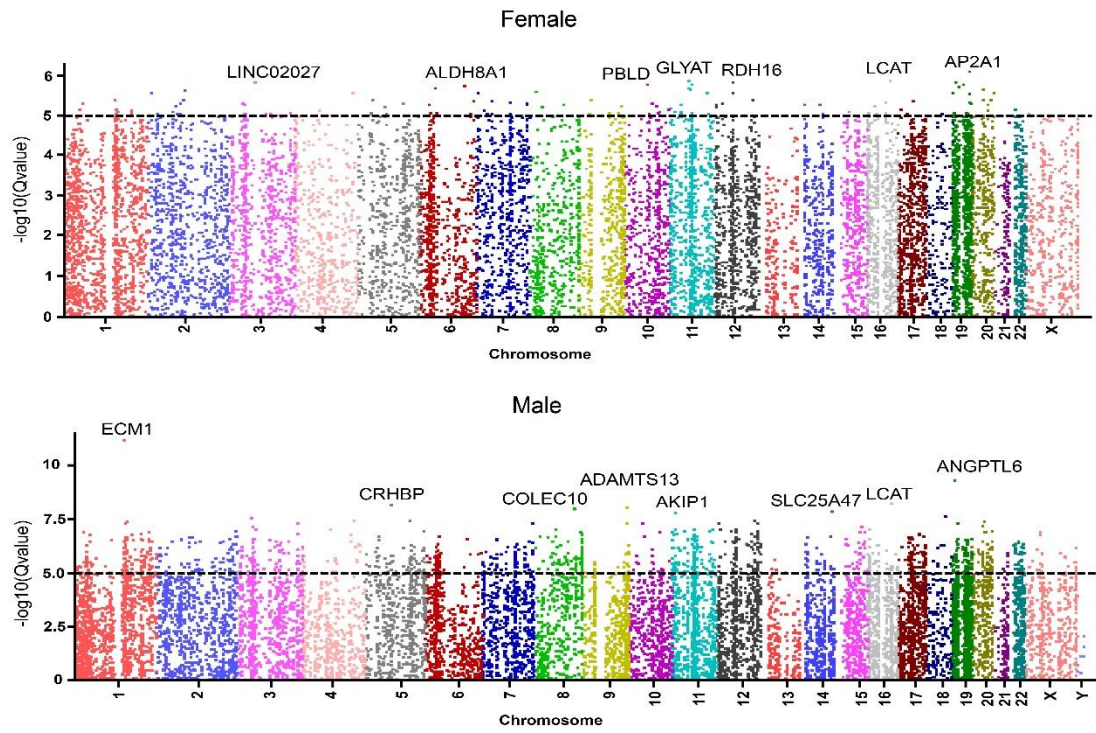

Figure S3

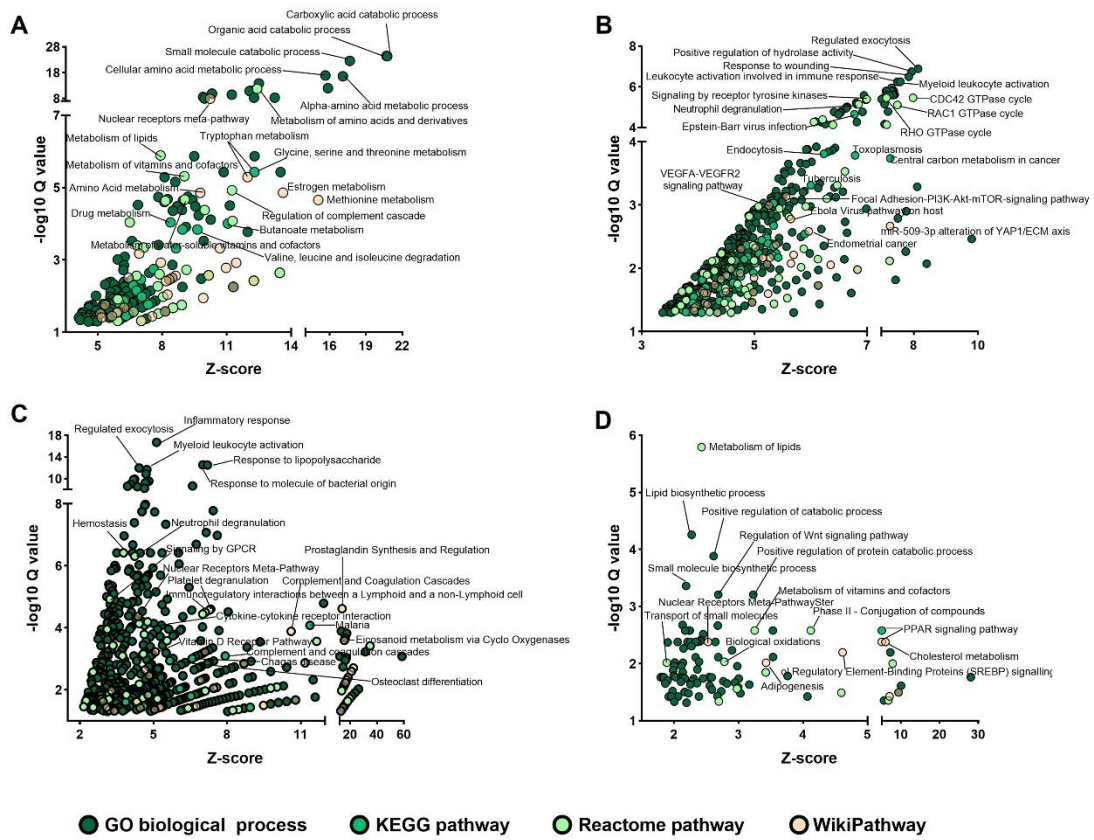

Figure S4

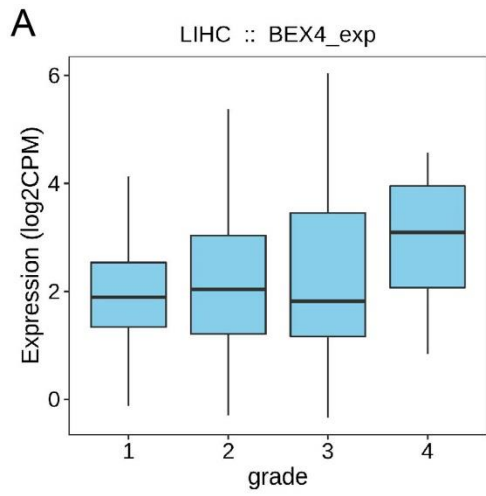

Spearman: rho=0.054, p=0.306

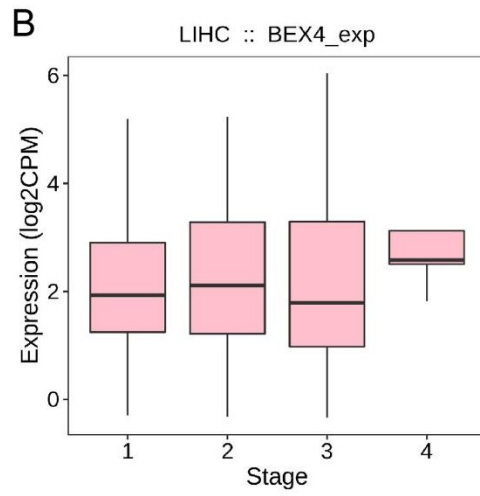

Spearman: rho=-0.02, p=0.716

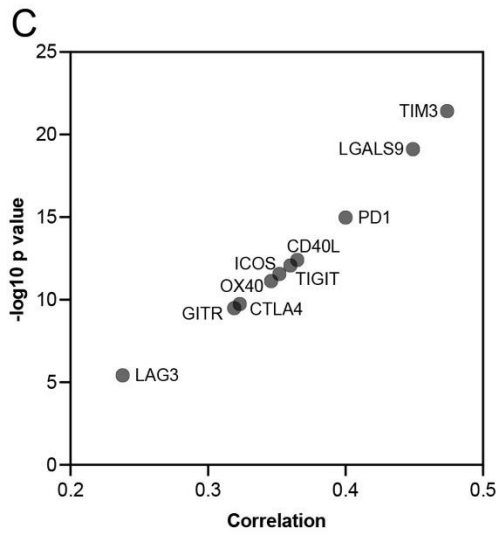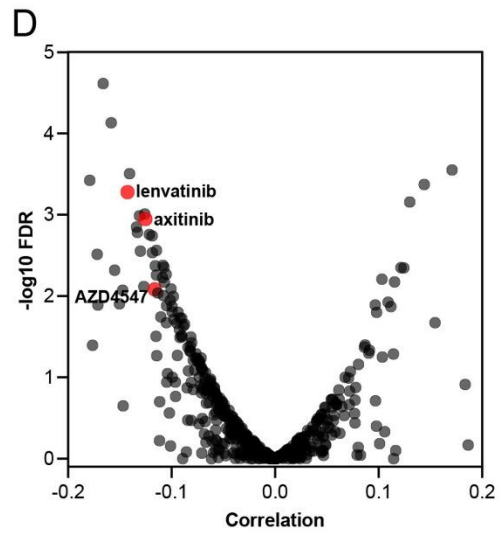

Figure S5

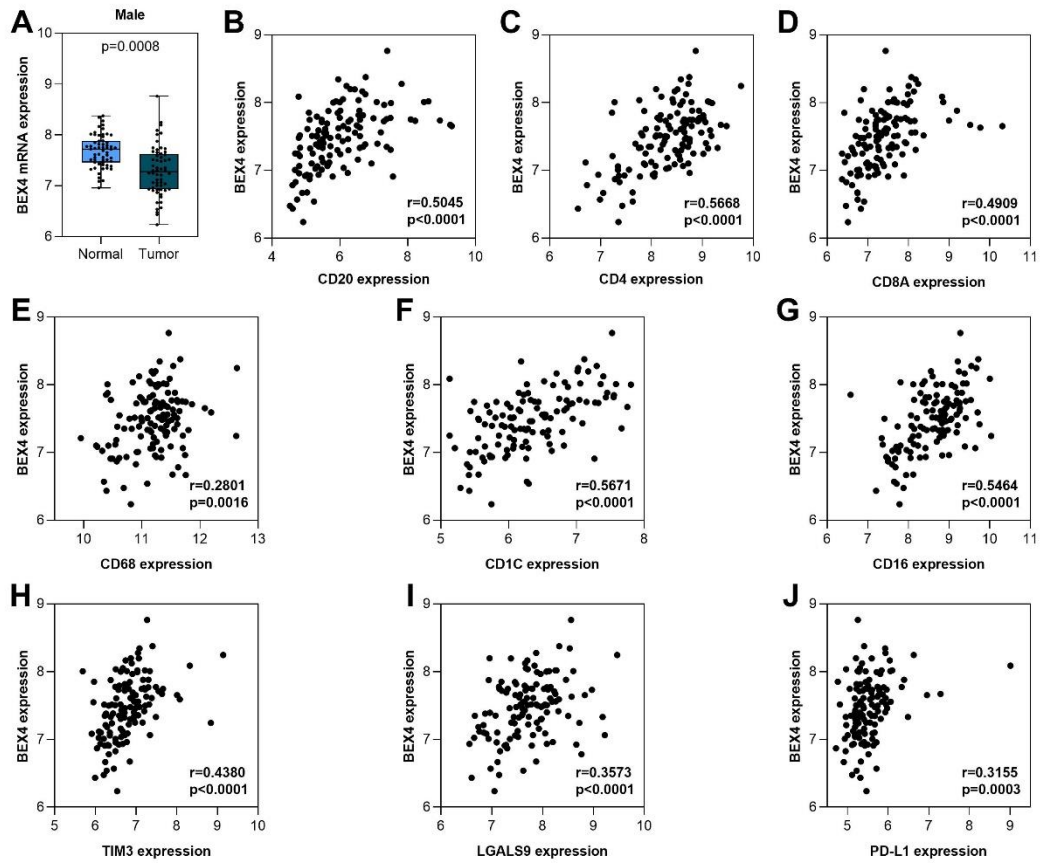

**Table S1. Clinicopathologic characteristics of TCGA cohort**

| <b>Characteristics</b>  | <b>Number of cases (%)</b> |
|-------------------------|----------------------------|
| <b>Age (y)</b>          |                            |
| <60                     | 171 (46.1)                 |
| ≥60                     | 200 (53.9)                 |
| <b>Gender</b>           |                            |
| Male                    | 250 (67.4)                 |
| Female                  | 121 (32.6)                 |
| <b>Race</b>             |                            |
| Caucasian               | 181 (48.8)                 |
| Asian                   | 161 (43.4)                 |
| African-American        | 19 (5.1)                   |
| NA                      | 10 (2.7)                   |
| <b>Clinical stage</b>   |                            |
| I                       | 175 (47.2)                 |
| II                      | 82 (22.1)                  |
| III                     | 85 (22.9)                  |
| IV                      | 5 (1.3)                    |
| NA                      | 24 (6.5)                   |
| <b>Tumor grade</b>      |                            |
| G1                      | 54 (14.6)                  |
| G2                      | 175 (47.2)                 |
| G3                      | 124 (33.4)                 |
| G4                      | 13 (4.8)                   |
| NA                      | 5 (1.3)                    |
| <b>T classification</b> |                            |
| T1                      | 185 (49.9)                 |
| T2                      | 90 (24.3)                  |
| T3                      | 80 (21.6)                  |
| T4                      | 13 (3.5)                   |
| Tx                      | 1 (0.8)                    |
| <b>N classification</b> |                            |
| N0                      | 255 (68.7)                 |
| N1                      | 4 (1.1)                    |
| Nx                      | 112 (30.2)                 |
| <b>M classification</b> |                            |
| M0                      | 268 (72.2)                 |
| M1                      | 4 (1.1)                    |
| Mx                      | 99 (26.7)                  |

**Table S2. Correlation between BEX4 expression and clinicopathologic characteristics of TCGA cohort**

| <b>Characteristics</b>  | <b>BEX4</b>    |                 | <b>P value</b> |
|-------------------------|----------------|-----------------|----------------|
|                         | Low, no. cases | High, no. cases |                |
| <b>Age (y)</b>          |                |                 |                |
| <60                     | 78             | 93              | 0.1299         |
| ≥60                     | 107            | 93              |                |
| <b>Gender</b>           |                |                 |                |
| Male                    | 129            | 121             | 0.3368         |
| Female                  | 56             | 65              |                |
| <b>Race</b>             |                |                 |                |
| Caucasian               | 94             | 87              | 0.521          |
| Asian                   | 74             | 87              |                |
| African-American        | 10             | 9               |                |
| <b>Clinical stage</b>   |                |                 |                |
| I                       | 92             | 83              | 0.4089         |
| II                      | 36             | 46              |                |
| III+IV                  | 43             | 47              |                |
| <b>Tumor grade</b>      |                |                 |                |
| G1                      | 22             | 32              | 0.4528         |
| G2                      | 89             | 86              |                |
| G3                      | 64             | 60              |                |
| G4                      | 5              | 8               |                |
| <b>T classification</b> |                |                 |                |
| T1                      | 95             | 90              | 0.6109         |
| T2                      | 39             | 51              |                |
| T3                      | 41             | 39              |                |
| T4                      | 7              | 6               |                |
| <b>N classification</b> |                |                 |                |
| N0                      | 123            | 132             | 0.6234         |
| N1                      | 1              | 3               |                |
| <b>M classification</b> |                |                 |                |
| M0                      | 127            | 141             | 0.3514         |
| M1                      | 3              | 1               |                |
